# Supplementary material
Source: publisher figshare collection journal article supplement (https://acs.figshare.com/ndownloader/files/14886905)
Supplement: Supplementary file 1 [file 14886905]

Supplementary table S1 - General and case-study specific modifications applied to the Yeast 6.06 model

| General modifications                  |                                                                                                           |                                                                                                                                                                                                                                               |
|----------------------------------------|-----------------------------------------------------------------------------------------------------------|-----------------------------------------------------------------------------------------------------------------------------------------------------------------------------------------------------------------------------------------------|
| Modification                           | Details                                                                                                   | Source/Justification                                                                                                                                                                                                                          |
| Added reaction r_4039                  | acetate_m + succinyl_CoA_m <----> succinate_m + acetyl_CoA_m                                              | imported from Yeast 7.11 (more recent consensus model)                                                                                                                                                                                        |
| Modified r_0718                        | NADP_m + S_malate_m <----> NADPH_m + pyruvate_m + carbon_dioxide_m                                        | updated according to Yeast 7.11 (more recent consensus model)                                                                                                                                                                                 |
| Modified r_0773                        | NADH_m + H_m + ubiquinone_6_m <----> NAD_m + ubiquinol_6_m                                                | updated according to Yeast 7.11 (more recent consensus model)                                                                                                                                                                                 |
| Modified r_0226                        | 4 H_c + 1 ADP_m + 1 phosphate_m <----> 3 H_m + 1 H2O_m + 1 ATP_m                                          | updated according to Yeast 7.11 (more recent consensus model)                                                                                                                                                                                 |
| Modified r_2129                        | H_m <----> H_c                                                                                            | updated according to Yeast 7.11 (more recent consensus model)                                                                                                                                                                                 |
| Modified r_1110                        | ADP_c + ATP_m <----> ATP_c + ADP_m                                                                        | updated according to Yeast 7.11 (more recent consensus model)                                                                                                                                                                                 |
| Modified r_0470                        | NAD_c + H2O_c + L_glutamate_c <----> H_c + NADH_c + ammonium_c + 2_oxoglutarate_c                         | updated according to Yeast 7.11 (more recent consensus model)                                                                                                                                                                                 |
| Removed r_0303                         | citrate_c <----> H2O + cis_aconitate_c                                                                    | updated according to Yeast 7.11 (more recent consensus model)                                                                                                                                                                                 |
| Removed r_0338                         | ubiquinone_6_m + S_dihydroorotate_c <----> ubiquinol_6_m + orotate_c                                      | updated according to Yeast 7.11 (more recent consensus model)                                                                                                                                                                                 |
| Removed r_0339                         | oxygen_c + S_dihydroorotate_c <----> hydrogen_peroxide_c + orotate_c                                      | updated according to Yeast 7.11 (more recent consensus model)                                                                                                                                                                                 |
| Removed r_2127                         | NAD_c + S_dihydroorotate_c <----> NADH_c + orotate_c                                                      | updated according to Yeast 7.11 (more recent consensus model)                                                                                                                                                                                 |
| Modified r_1254                        | H_e + pyruvate_e <----> H_c + pyruvate_c                                                                  | updated according to Yeast 7.11 (more recent consensus model)                                                                                                                                                                                 |
| Gene rule update r_0530                | (YPL252C AND YDR376W) or (YPL252C AND YDR376W AND YER141W)                                                | updated according to Yeast 7.11 (more recent consensus model)                                                                                                                                                                                 |
| Updated biomass reaction r_4041        | Add 1.0E-6 * chitin_c and 1.0E-6 * heme_a_m to reactants                                                  | updated according to Yeast 7.11 (more recent consensus model)                                                                                                                                                                                 |
| gene rule update r_0076                | (YER037W or YGL224C)                                                                                      | updated according to Yeast 7.11 (more recent consensus model)                                                                                                                                                                                 |
| gene rule update r_0078                | (YER037W or YGL224C)                                                                                      | updated according to Yeast 7.11 (more recent consensus model)                                                                                                                                                                                 |
| gene rule update r_1619                | YER037W                                                                                                   | updated according to Yeast 7.11 (more recent consensus model)                                                                                                                                                                                 |
| Removed r_0333                         | phosphate_c + 2_deoxyuridine_c <----> uracil_c + 2_deoxy_D_ribofuranose_1_phosphate_c                     | updated according to Yeast 7.11 (more recent consensus model)                                                                                                                                                                                 |
| Removed r_0944                         | phosphate_c + adenosine_c <----> alpha_D_ribose_1_phosphate_c + adenine_c                                 | updated according to Yeast 7.11 (more recent consensus model)                                                                                                                                                                                 |
| Removed r_0945                         | phosphate_m + adenosine_m <----> adenine_m + alpha_D_ribose_1_phosphate_m                                 | updated according to Yeast 7.11 (more recent consensus model)                                                                                                                                                                                 |
| Removed r_0946                         | phosphate_c + 2_deoxyadenosine_c <----> 2_deoxy_D_ribofuranose_1_phosphate_c + adenine_c                  | updated according to Yeast 7.11 (more recent consensus model)                                                                                                                                                                                 |
| Removed r_0947                         | phosphate_c + 2_deoxyguanosine_c <----> guanine_c + 2_deoxy_D_ribofuranose_1_phosphate_c                  | updated according to Yeast 7.11 (more recent consensus model)                                                                                                                                                                                 |
| Removed r_0948                         | phosphate_c + 2_deoxyinosine_c <----> hypoxanthine_c + 2_deoxy_D_ribofuranose_1_phosphate_c               | updated according to Yeast 7.11 (more recent consensus model)                                                                                                                                                                                 |
| Removed r_0952                         | phosphate_c + xanthosine_c <----> alpha_D_ribose_1_phosphate_c + 9H_xanthine_c                            | updated according to Yeast 7.11 (more recent consensus model)                                                                                                                                                                                 |
| Removed r_1044                         | phosphate_c + thymidine_c <----> 2_deoxy_D_ribofuranose_1_phosphate_c + thymine_c                         | updated according to Yeast 7.11 (more recent consensus model)                                                                                                                                                                                 |
| Added reaction r_4045                  | H2O_c + uridine_c <----> uracil_c + D_ribose_c                                                            | imported from Yeast 7.11 (more recent consensus model)                                                                                                                                                                                        |
| gene rule update r_0888                | (YMR105C or YKL127W)                                                                                      | updated according to Yeast 7.11 (more recent consensus model)                                                                                                                                                                                 |
| gene rule update r_0907                | ((YMR278W or YMR105C) or YKL127W)                                                                         | updated according to Yeast 7.11 (more recent consensus model)                                                                                                                                                                                 |
| Modified r_0110                        | H_c + coenzyme_A_c + acetate_c <----> H2O_c + acetyl_CoA_c                                                | As corrected in Pereira R, Nielsen J, Rocha I (2016) Improving the flux distributions simulated with genome-scale metabolic models of <i>Saccharomyces cerevisiae</i> . <i>Metab Eng Commun</i> 3: 153–163. doi:10.1016/j.meteno.2016.05.002. |
| Added reaction r_0234x                 | NAD_c + zymosterol_intermediate_1c_c <----> H_c + NADH_c + carbon_dioxide_c + zymosterol_intermediate_2_c | As corrected in Pereira R, Nielsen J, Rocha I (2016) Improving the flux distributions simulated with genome-scale metabolic models of <i>Saccharomyces cerevisiae</i> . <i>Metab Eng Commun</i> 3: 153–163. doi:10.1016/j.meteno.2016.05.002. |
| Added reaction r_0939x                 | prephenate_c + NAD_c <----> NADH_c + 3_4_hydroxyphenylpyruvate_c + carbon_dioxide_c                       | As corrected in Pereira R, Nielsen J, Rocha I (2016) Improving the flux distributions simulated with genome-scale metabolic models of <i>Saccharomyces cerevisiae</i> . <i>Metab Eng Commun</i> 3: 153–163. doi:10.1016/j.meteno.2016.05.002. |
| Inactivated r_1840                     | 3_hydroxy_3_methylglutaryl_CoA_c <----> 3_hydroxy_3_methylglutaryl_CoA_m                                  | No data supporting such reaction                                                                                                                                                                                                              |
| Modified r_1117                        | H_c + L_aspartate_c <----> H_m + L_aspartate_m                                                            | As corrected in Pereira R, Nielsen J, Rocha I (2016) Improving the flux distributions simulated with genome-scale metabolic models of <i>Saccharomyces cerevisiae</i> . <i>Metab Eng Commun</i> 3: 153–163. doi:10.1016/j.meteno.2016.05.002. |
| Modifications for PHB production       |                                                                                                           |                                                                                                                                                                                                                                               |
| Added reaction R_phaA                  | 2 acetyl_CoA_c <----> coenzyme_A_c + acetoacetyl_CoA_c                                                    | Acetoacetyl-CoA thiolase from <i>Ralstonia eutropha</i>                                                                                                                                                                                       |
| Added reaction R_phaB                  | H_c + NADPH_c + acetoacetyl_CoA_c <----> 3hbcoa_c + NADP_c                                                | Acetoacetyl-CoA reductase from <i>Ralstonia eutropha</i>                                                                                                                                                                                      |
| Added reaction R_phaC                  | 3hbcoa_c <----> phb_c + coenzyme_A_c                                                                      | PHB synthase from <i>Ralstonia eutropha</i>                                                                                                                                                                                                   |
| Added reaction R_EX_phb_e              | phb_c <---->                                                                                              | PHB drain reaction required for simulation purposes                                                                                                                                                                                           |
| Modifications for 3-HP production      |                                                                                                           |                                                                                                                                                                                                                                               |
| Added reaction R_MCR                   | 2* H_c + 2* NADPH_c + 1* malonyl_CoA_c <----> 1* coenzyme_A_c + 2* NADP_c + 1* 3hp_c                      | Malonyl-CoA reductase from <i>Chloroflexus aurantiacus</i>                                                                                                                                                                                    |
| Added reaction R_EX_3hp_e              | M_3hp_c <---->                                                                                            | 3-HP drain reaction required for simulation purposes                                                                                                                                                                                          |
| Added reaction R_gapN                  | glyceraldehyde_3_phosphate_c + H2O_c + NADP_c <----> H_c + NADPH_c + 3_phosphoglycerate_c                 | Glyceraldehyde-3-phosphate dehydrogenase from <i>Streptococcus mutans</i>                                                                                                                                                                     |
| Modifications for santalene production |                                                                                                           |                                                                                                                                                                                                                                               |
| Added reaction R_SANSYN                | farnesyl_diphosphate_c <----> diphosphate_c + santalene_c                                                 | Santalene synthase from <i>Clausena lansium</i>                                                                                                                                                                                               |
| Added reaction R_EX_santalene_e        | santalene_c <---->                                                                                        | santalene drain reaction required for simulation purposes                                                                                                                                                                                     |
